# Supplementary material for: Synthesis, chemical characterization, and biological evaluation of a novel auranofin derivative as an anticancer agent
Source: Royal Society of Chemistry journal article supplement (doi:10.1039/d2dt00836j), 2022-01-01
Supplement: d2dt00836j1.pdf [file d2dt00836j1.pdf]

## Synthesis, chemical characterization, and biological evaluation of a novel auranofin derivative as an anticancer agent

Damiano Cirri, Lara Massai, Chiara Giacomelli, Maria Letizia Trincavelli, Annalisa Guerri, Chiara Gabbiani, Luigi Messori, Alessandro Pratesi

### Supporting Material

#### Contents

|                                                                                 |    |
|---------------------------------------------------------------------------------|----|
| NMR characterization .....                                                      | 2  |
| Solution stability .....                                                        | 3  |
| Crystal data .....                                                              | 5  |
| Interaction with biological target models <sup>31</sup> P NMR spectra .....     | 7  |
| In vitro cells analysis .....                                                   | 9  |
| Accurate mass analysis of ethylthiosalicylate (triethylphosphine) gold(I) ..... | 11 |

# NMR characterization

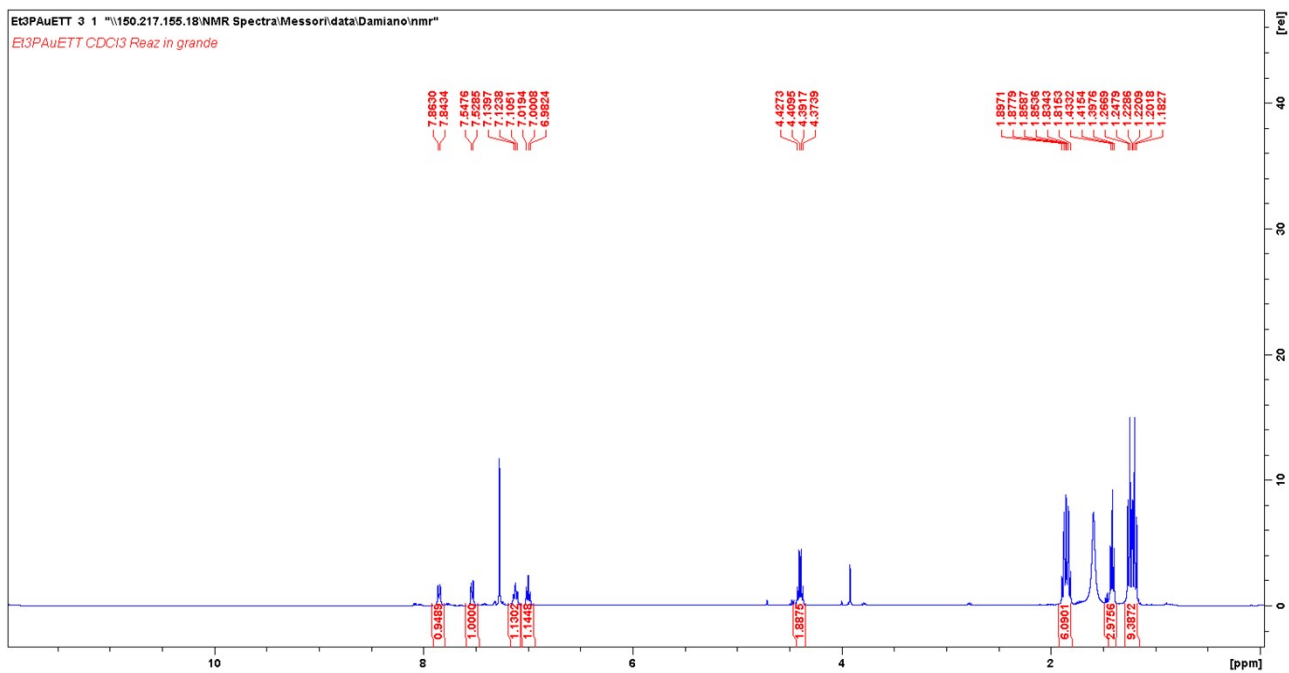

Fig.S1: <sup>1</sup>H NMR spectrum of AFETT in CDCl<sub>3</sub>

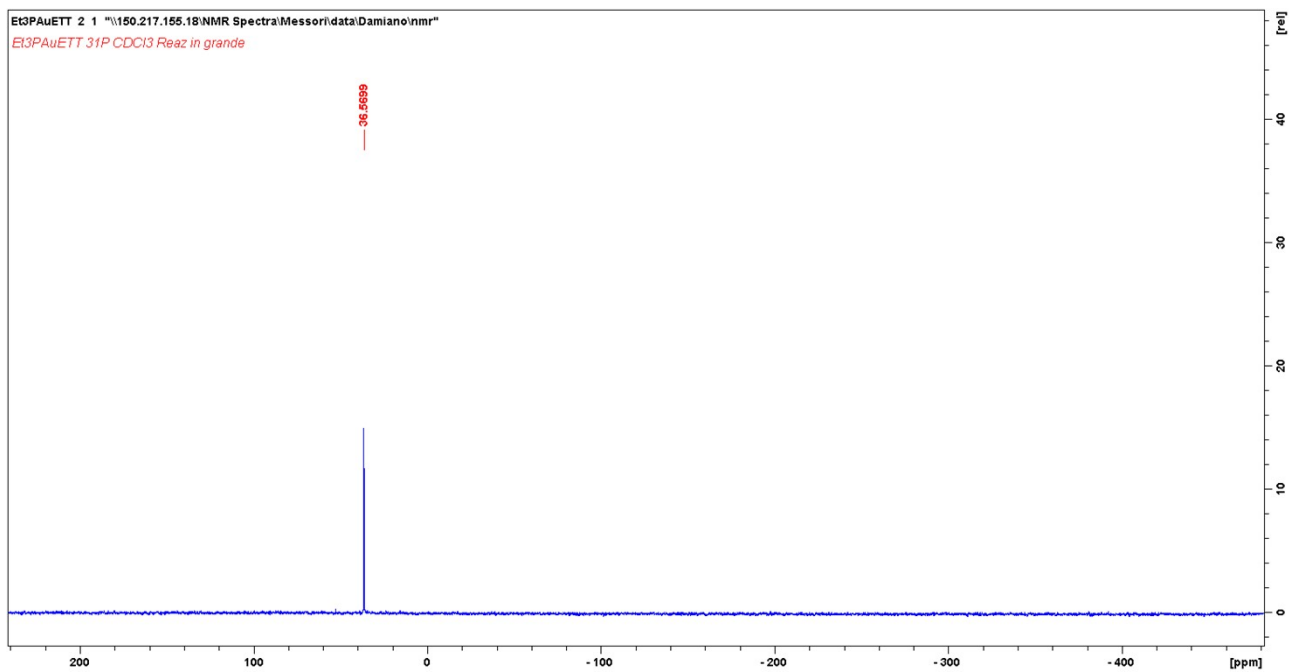

Fig.S2: <sup>31</sup>P NMR spectrum of AFETT in CDCl<sub>3</sub>

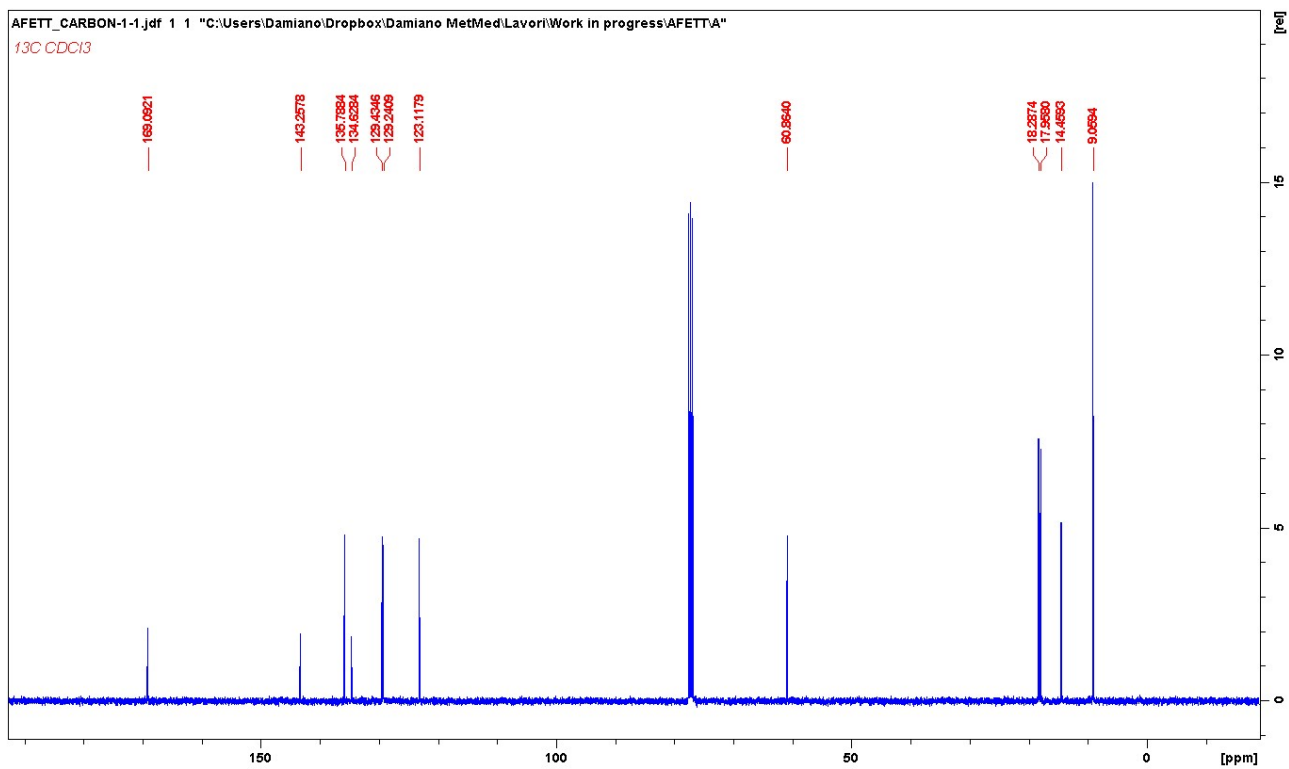

**Fig.S3:** <sup>13</sup>CNMR spectrum of AFETT in CDCl<sub>3</sub>

## Solution stability

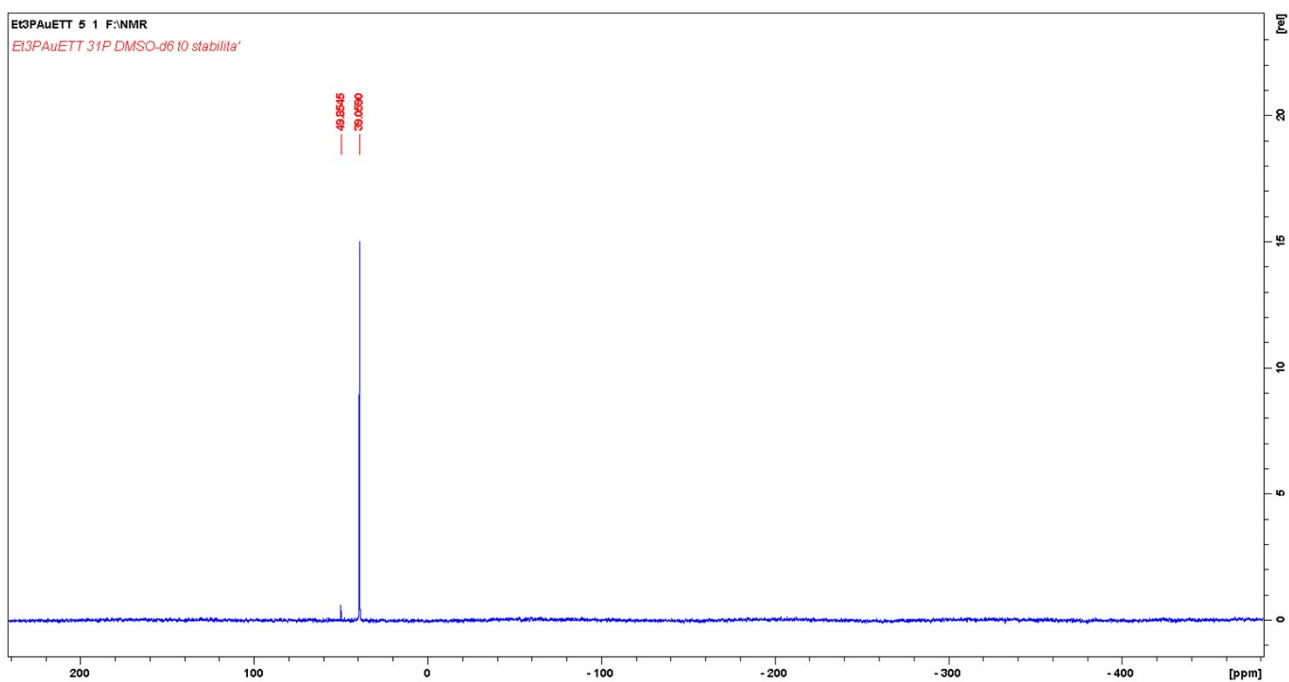

**Fig.S4:** AFETT stability control. <sup>31</sup>PNMR spectrum performed in dimethylsulfoxide-d<sub>6</sub> at t<sub>0</sub>.

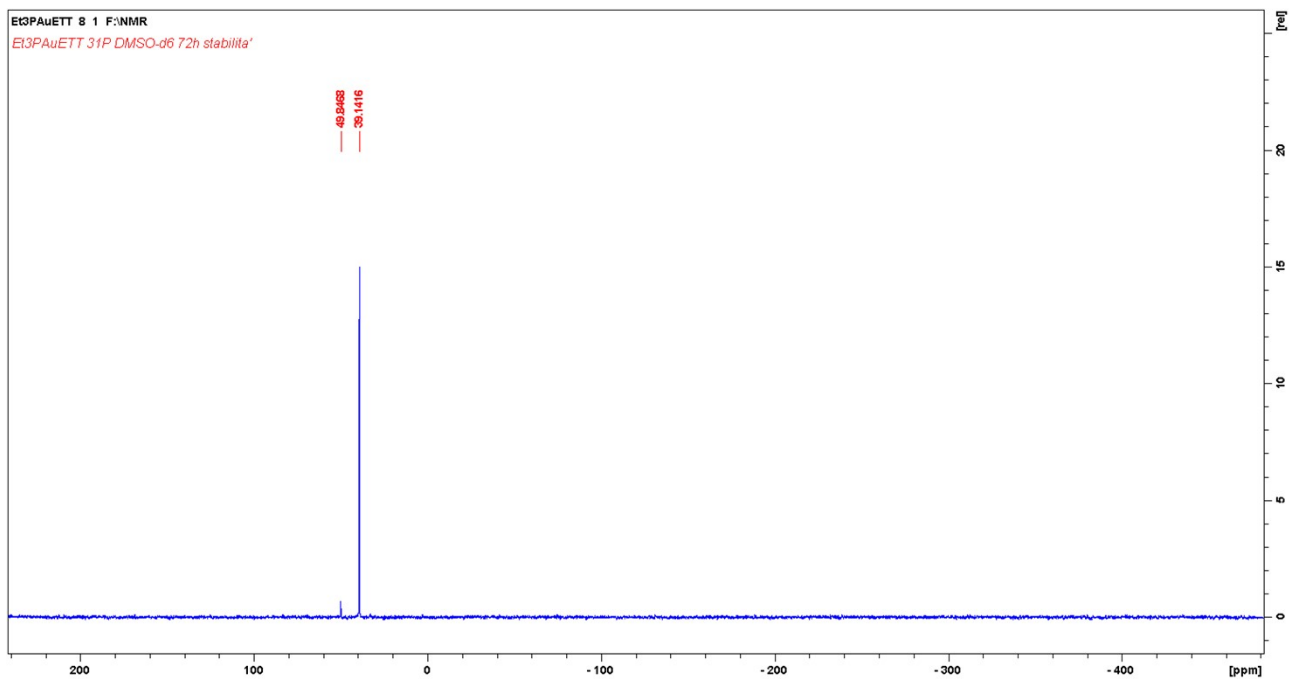

**Fig.S5:** AFETT stability control. <sup>31</sup>P NMR spectrum performed in dimethylsulfoxide-d<sub>6</sub> at 72h.

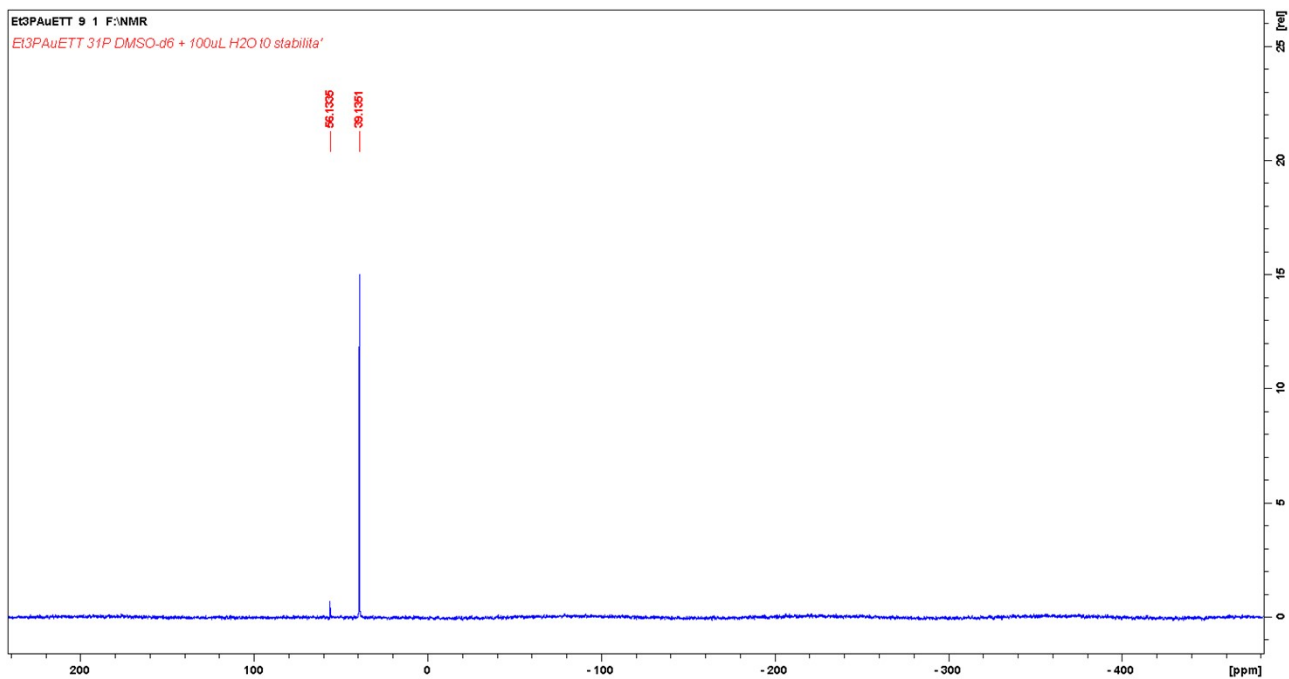

**Fig.S6:** AFETT stability control. <sup>31</sup>P NMR spectrum performed in dimethylsulfoxide-d<sub>6</sub> (400 μL) and H<sub>2</sub>O (100 μL) at t<sub>0</sub>.

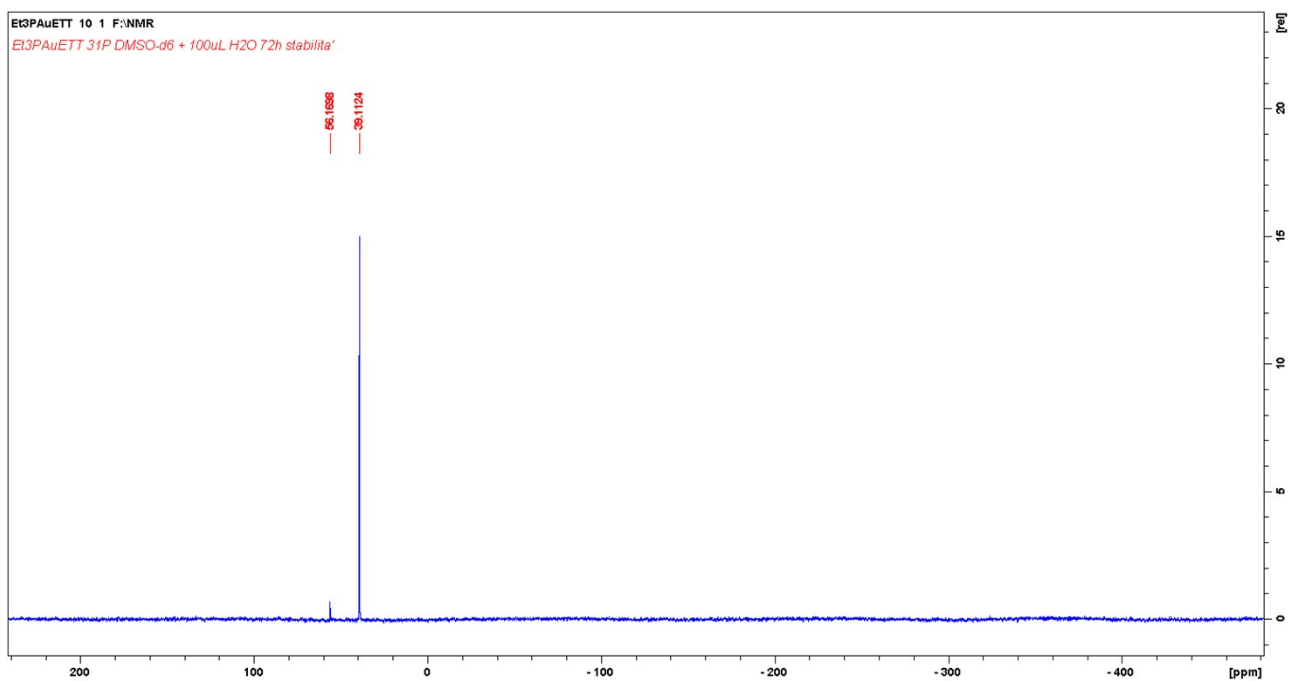

**Fig.S7:** AFETT stability control.  $^{31}\text{P}$ NMR spectrum performed in dimethylsulfoxide- $\text{d}_6$  (400  $\mu\text{L}$ ) and  $\text{H}_2\text{O}$  (100  $\mu\text{L}$ ) at 72h.

## Crystal data

**Table S1:** Bond lengths ( $\text{\AA}$ ) and angles ( $^\circ$ ) for compound ethylthiosalicylate(triethylphosphine)gold(I)

|                 |           |
|-----------------|-----------|
| Au(1)–P(1)      | 2,270(2)  |
| Au(1)–S(1)      | 2,325(1)  |
| Au --- Au       | 3.0112(4) |
| P(1)–Au(1)–S(1) | 175,80(6) |

**Table S2:** Crystal data and refinement parameters for the compound ethylthiosalicylate(triethylphosphine)gold(I)

|                                         | <b>Compound</b>                                     |
|-----------------------------------------|-----------------------------------------------------|
| Empirical formula                       | C <sub>15</sub> H <sub>24</sub> AuO <sub>2</sub> PS |
| Formula weight                          | 496.36                                              |
| Temperature (K)                         | 100(2)                                              |
| Wavelength (Å)                          | 0.71073                                             |
| Crystal system, space group             | Orthorhombic, F dd2                                 |
| Unit cell dimensions (Å)                | a = 43,937(2)<br>b = 12,2850(6)<br>c = 12,9940(6)   |
| Volume (Å <sup>3</sup> )                | 7013,7(6)                                           |
| Z, D <sub>c</sub> (mg/cm <sup>3</sup> ) | 16, 1,880                                           |
| μ (mm <sup>-1</sup> )                   | 8,599                                               |
| F(000)                                  | 3840                                                |
| Crystal size (mm)                       |                                                     |
| θ range (°)                             | 2,672 – 34.335                                      |
| Reflections collected / unique          | 36070 / 7292                                        |
| Data / restraints / parameters          | 7292 / 1 / 185                                      |
| Goodness-of-fit on F <sup>2</sup>       | 1,194                                               |
| Final R indices [I>2σ(I)]               | R <sub>1</sub> = 0.0265; wR <sub>2</sub> = 0.0624   |
| R indices (all data)                    | R <sub>1</sub> = 0.0288; wR <sub>2</sub> = 0.0617   |
| Flack x =                               | 0.070(4)                                            |

## Interaction with biological target models $^{31}\text{P}$ NMR spectra

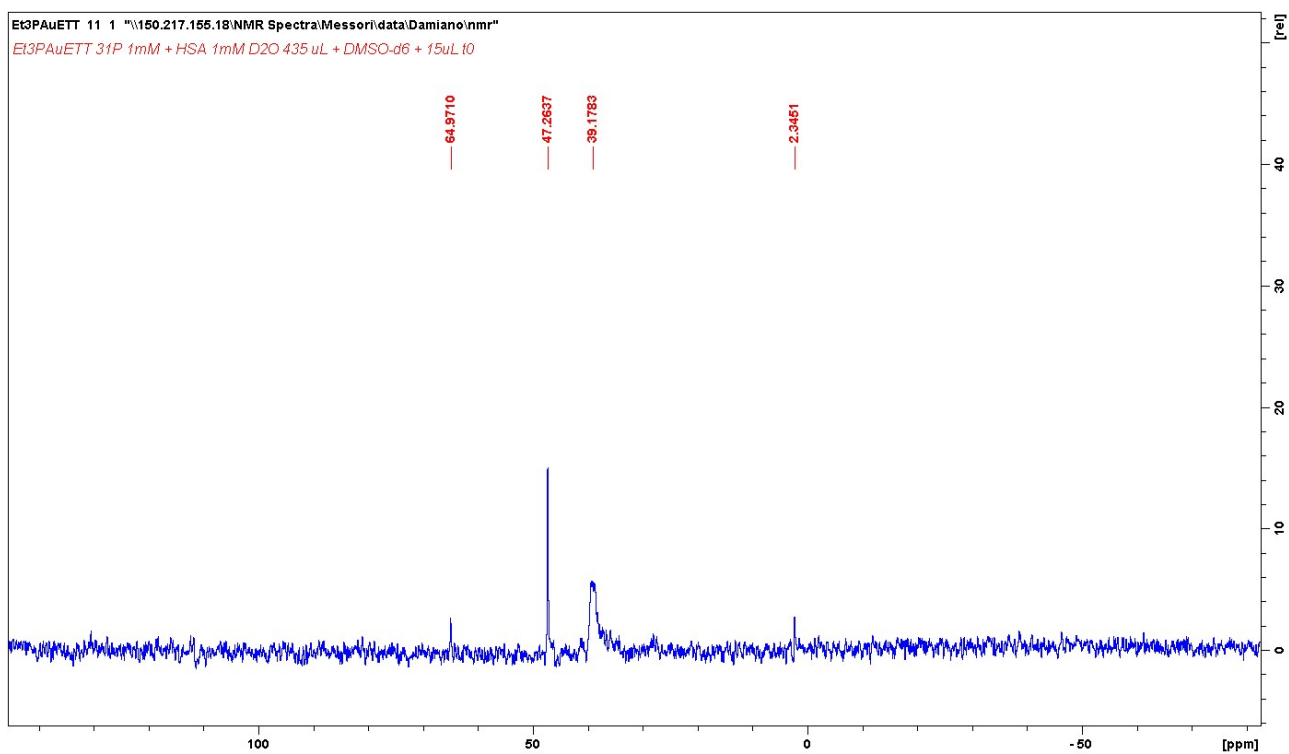

**Fig.S8:**  $^{31}\text{P}$ NMR spectrum of AFETT 1 mM with HSA 1 mM acquired at  $t_0$ . Sample prepared in  $\text{D}_2\text{O}$  (435  $\mu\text{L}$ ) and dimethylsulfoxide- $\text{d}_6$  (15  $\mu\text{L}$ ).

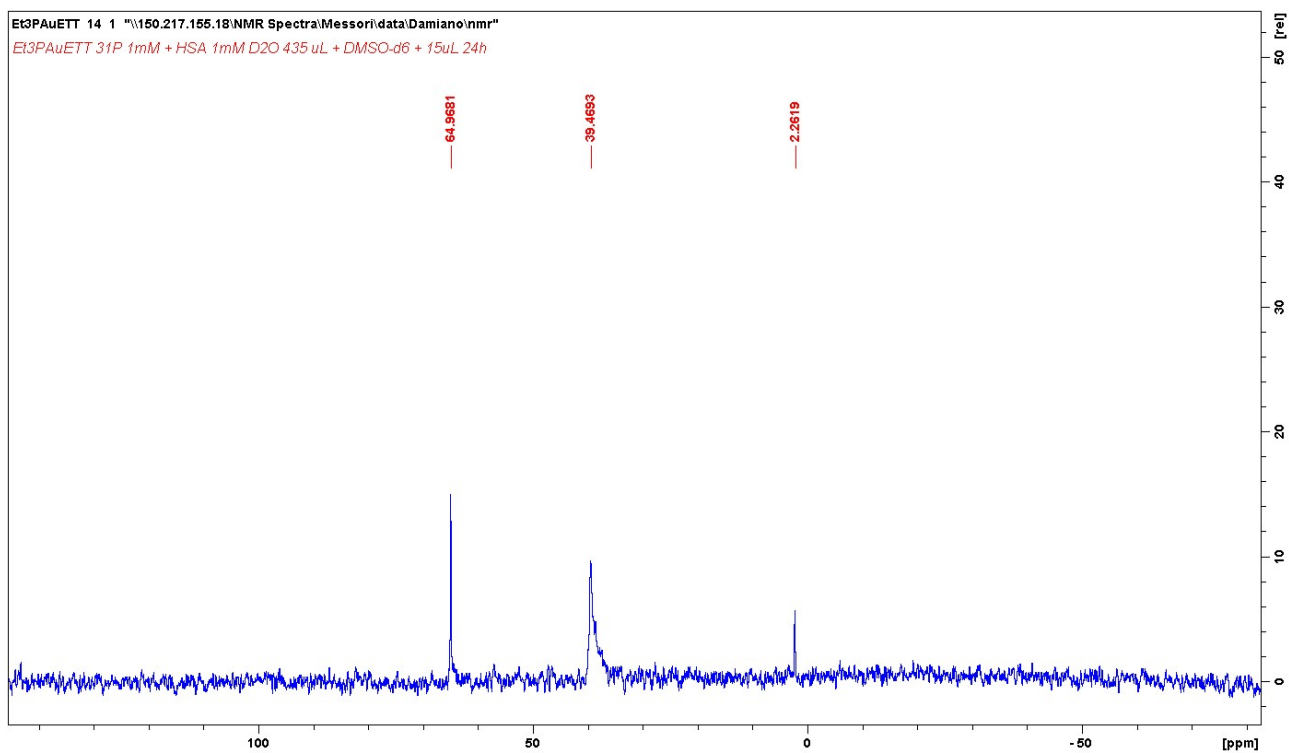

**Fig.S9:**  $^{31}\text{P}$ NMR spectrum of AFETT 1 mM with HSA 1 mM acquired at 24h. Sample prepared in  $\text{D}_2\text{O}$  (435  $\mu\text{L}$ ) and dimethylsulfoxide- $\text{d}_6$  (15  $\mu\text{L}$ ).

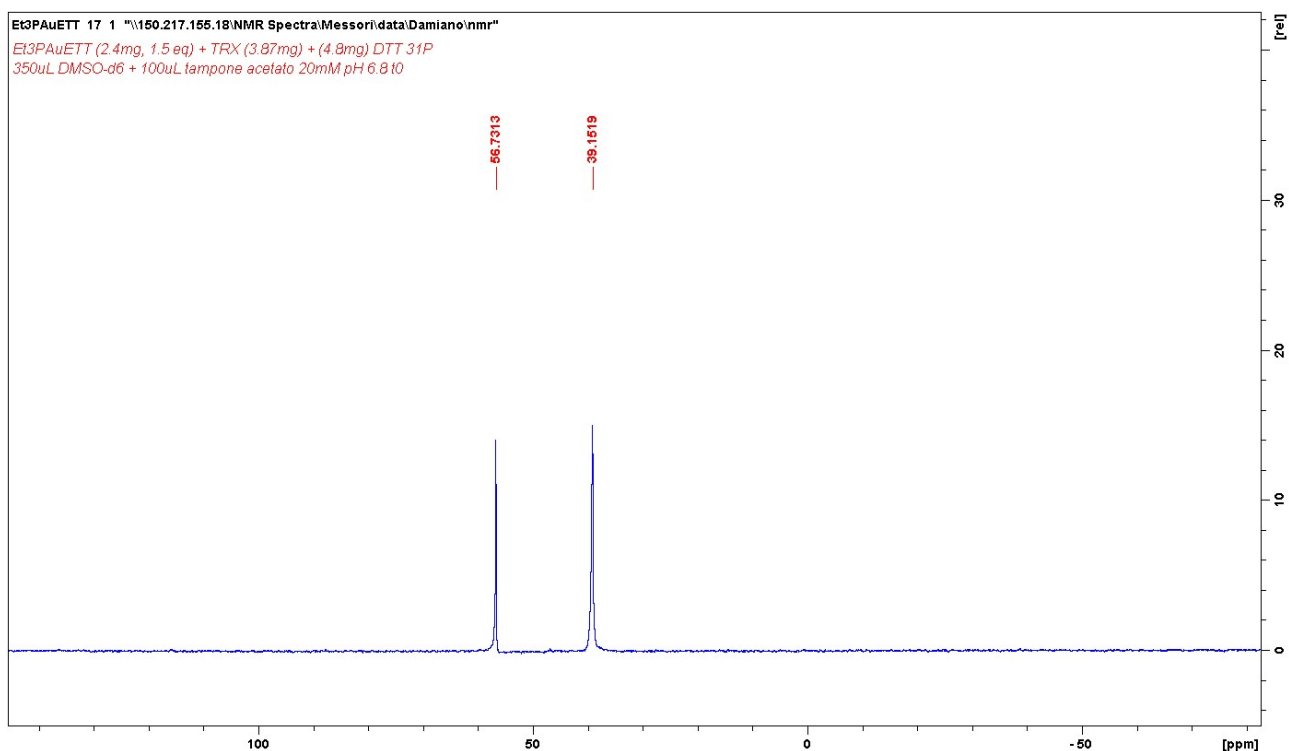

**Fig.S10:** <sup>31</sup>P NMR spectrum of AFETT (2.4; 1.5 eq.) with thioredoxin reductase dodecapeptide dTrxR (3.87 mg; 1 eq.) and dithiothreitol (4.8 mg; excess) acquired at  $t_0$ . Sample prepared dimethylsulfoxide- $d_6$  (350  $\mu$ L) and ammonium acetate buffer 20 mM pH 6.8 (100  $\mu$ L).

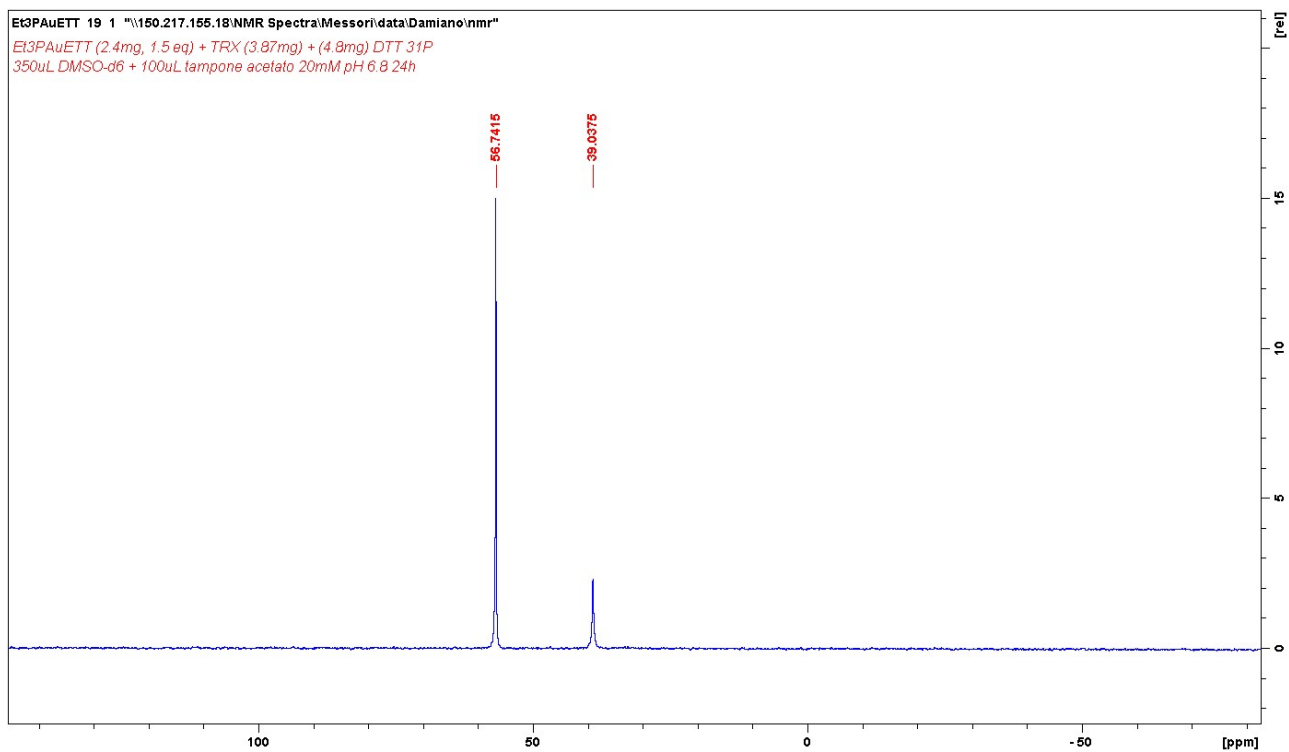

**Fig.S11:** <sup>31</sup>P NMR spectrum of AFETT (2.4; 1.5 eq.) with thioredoxin reductase dodecapeptide dTrxR (3.87 mg; 1 eq.) and dithiothreitol (4.8 mg; excess) acquired at 24h. Sample prepared dimethylsulfoxide- $d_6$  (350  $\mu$ L) and ammonium acetate buffer 20 mM pH 6.8 (100  $\mu$ L).



## In vitro cells analysis

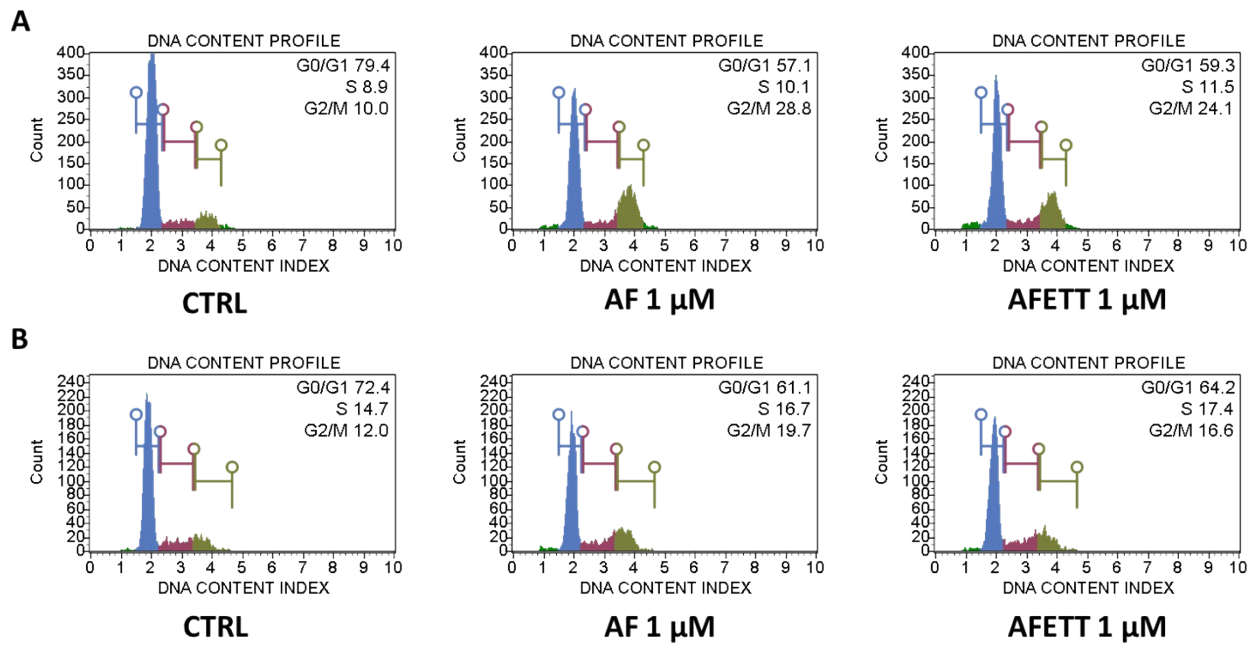

**Fig.S12:** Representative cell cycle histograms of untreated and treated A2780 (A) and A2780-R (B) cells were reported. The figure summarised the results for AFETT, auranofin (AF) and untreated cells (CTRL).

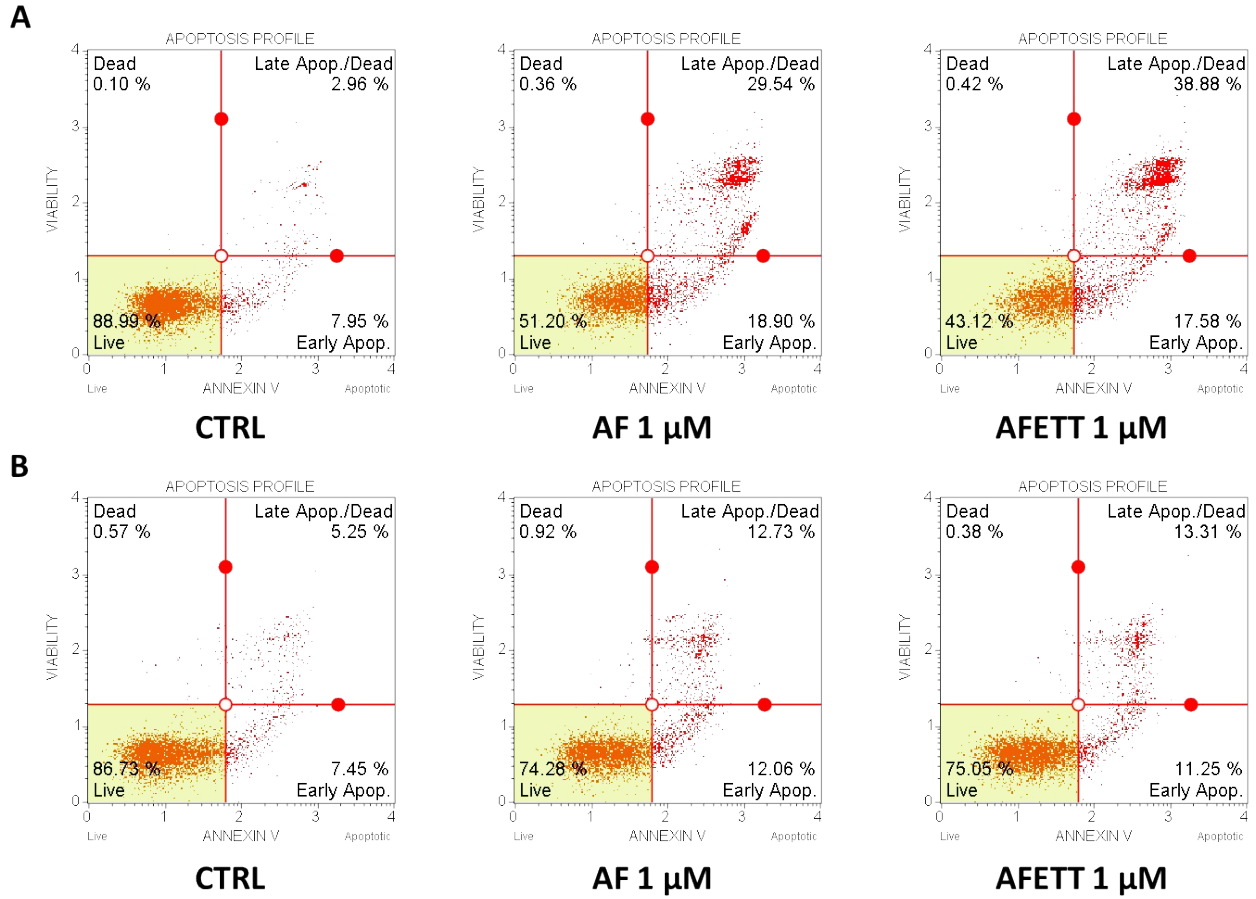

**Fig.S13:** Representative Annexin V/7-AAD histograms of untreated and treated A2780 (A) and A2780-R (B) cells were reported. The figure summarised the results for AFETT, auranofin (AF) and untreated cells (CTRL).

# Accurate mass analysis of ethylthiosalicylate (triethylphosphine) gold(I)

● Spectrum from Alessandro3.wiff (sample 19) - AFETT\_10-6M\_MeOH\_270622, +TOF MS (250 - 650)  
● Isotopic Distribution for C<sub>15</sub>H<sub>24</sub>AuO<sub>2</sub>PS H<sup>+</sup>

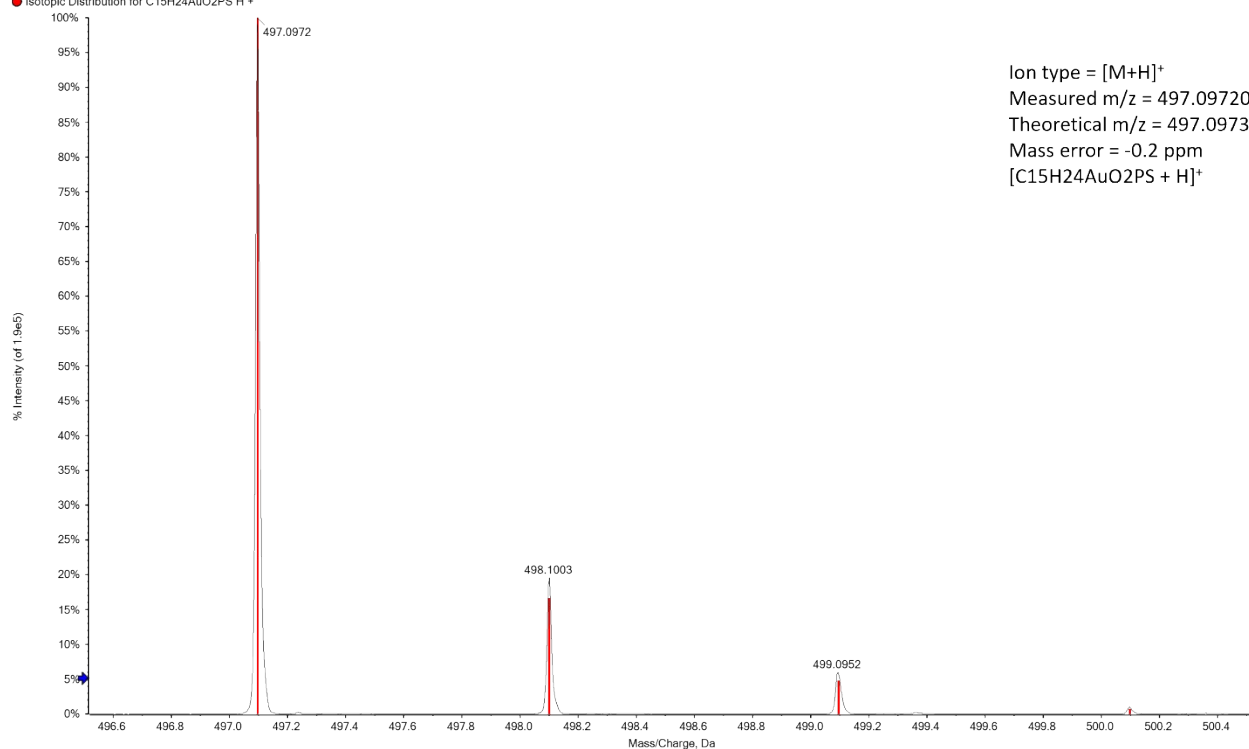

**Fig. S14:** Superimposition of the theoretical and the experimental isotopic distribution of the ethylthiosalicylate (triethylphosphine) gold(I) complex. HR-ESI-MS: [M]<sup>+</sup> m/z = 497.09720 (theoretical for [C<sub>15</sub>H<sub>24</sub>AuO<sub>2</sub>PS + H]<sup>+</sup>: m/z = 497.09730; error: -0.2 ppm).
